# Supplementary material for: Austalides S-U, New Meroterpenoids from the Sponge-Derived Fungus Aspergillus aureolatus HDN14-107
Source: PubMed Central journal article supplement (PMC4962021; doi:10.3390/md14070131), 2016-07-14
Supplement: marinedrugs-14-00131-s001.pdf [file marinedrugs-14-00131-s001.pdf]

# Supplementary Materials: Austalides S-U, New Meroterpenoids from the Sponge-Derived Fungus *Aspergillus aureolatus* HDN14-107

Jixing Peng, Xiaomin Zhang, Wei Wang, Tianjiao Zhu, Qianqun Gu and Dehai Li

HRESIMS, 1D and 2D NMR data of **1** in CDCl<sub>3</sub> (Figures S1–S9);

HRESIMS, 1D and 2D NMR data of **2** in CDCl<sub>3</sub> (Figures S10–S17);

HRESIMS, 1D and 2D NMR data of **3** in CD<sub>3</sub>CN (Figures S17–S25);

HPLC analysis of the EtOAc extract of *Aspergillus aureolatus* HDN14-107 (Figure S26);

Computational data (Figures S27).

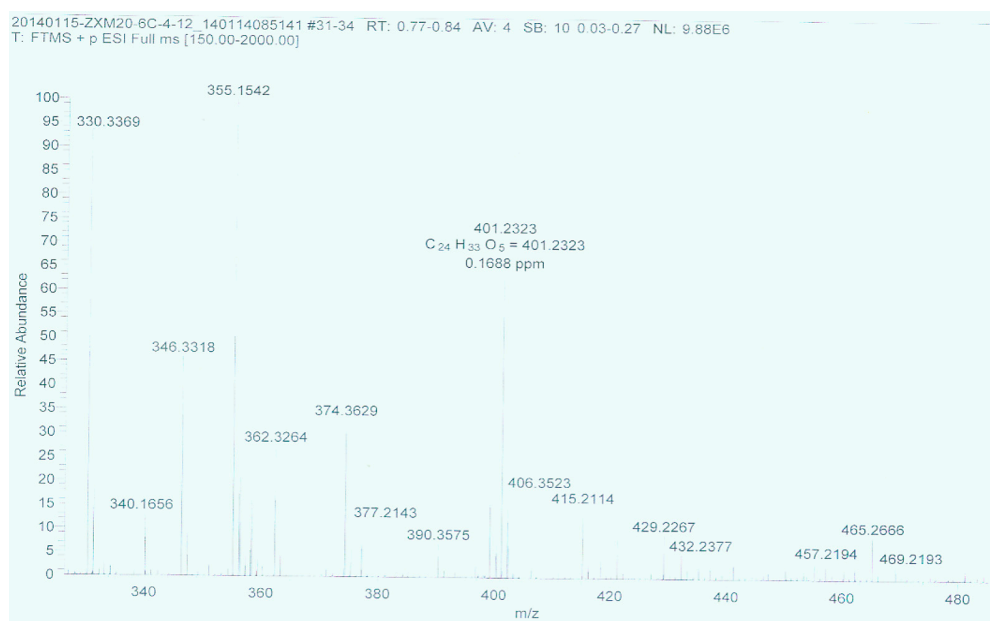

Figure S1. HR-ESI-MS of **1**.

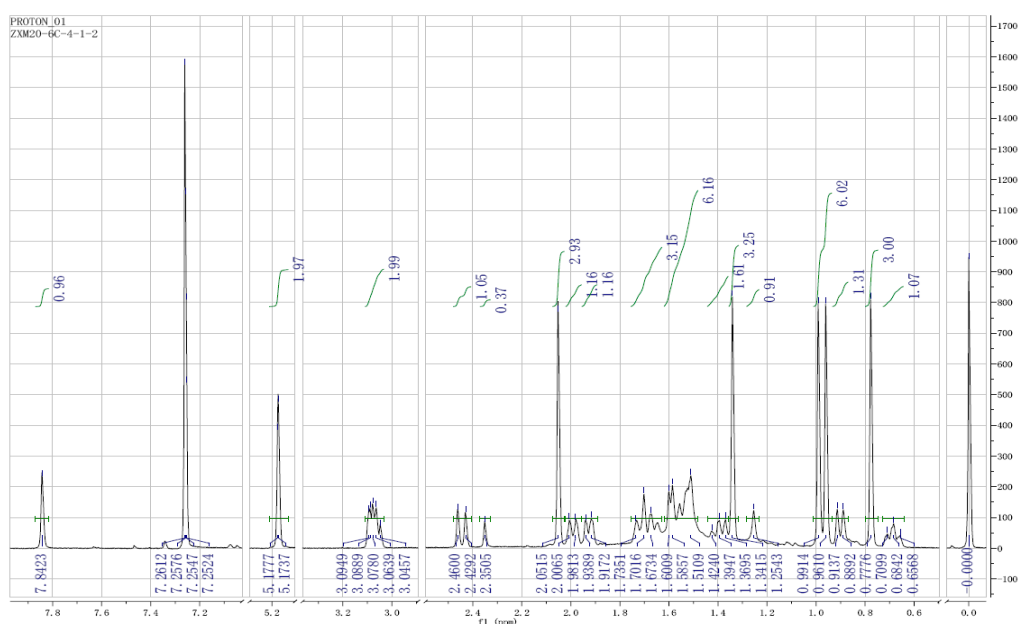

Figure S2. <sup>1</sup>H NMR (500 MHz) spectrum of **1** in CDCl<sub>3</sub>.

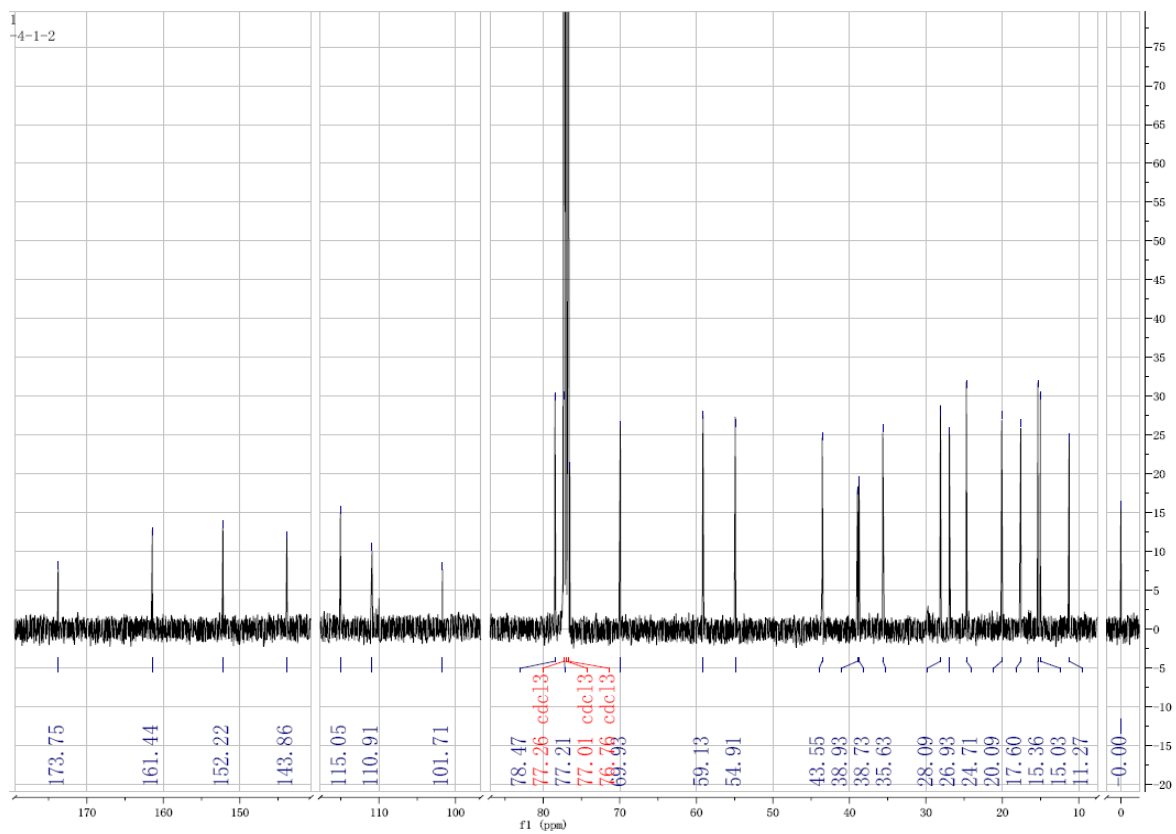

Figure S3.  $^{13}\text{C}$  NMR spectrum of **1** in  $\text{CDCl}_3$ .

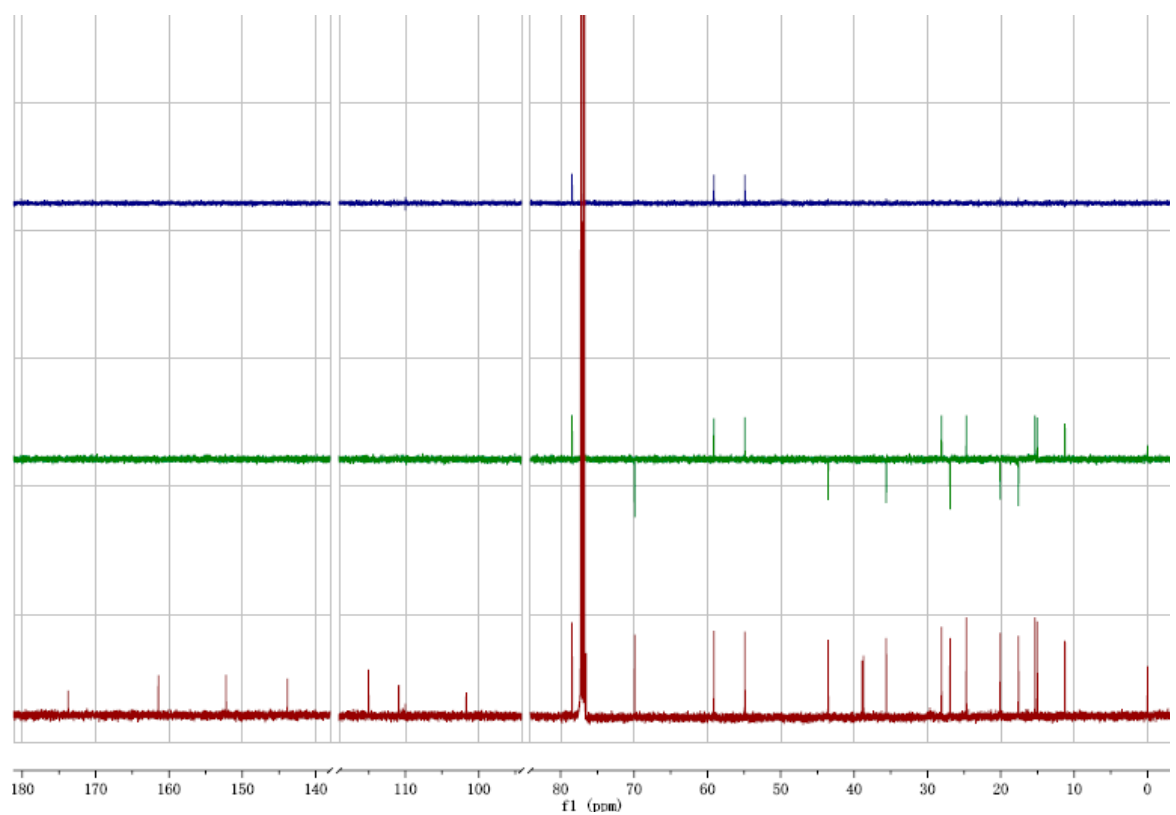

Figure S4. DEPT spectrum of **1** in  $\text{CDCl}_3$ .

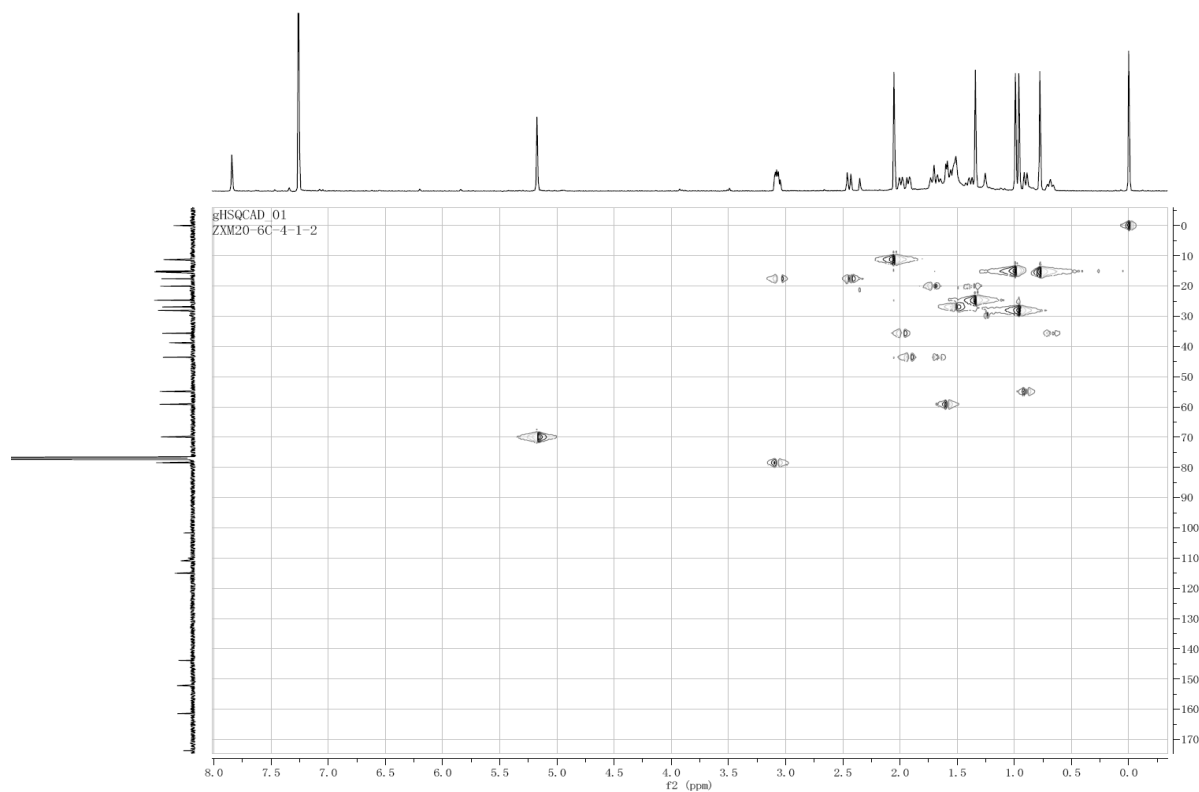

Figure S5. HMQC spectrum of 1 in CDCl<sub>3</sub>.

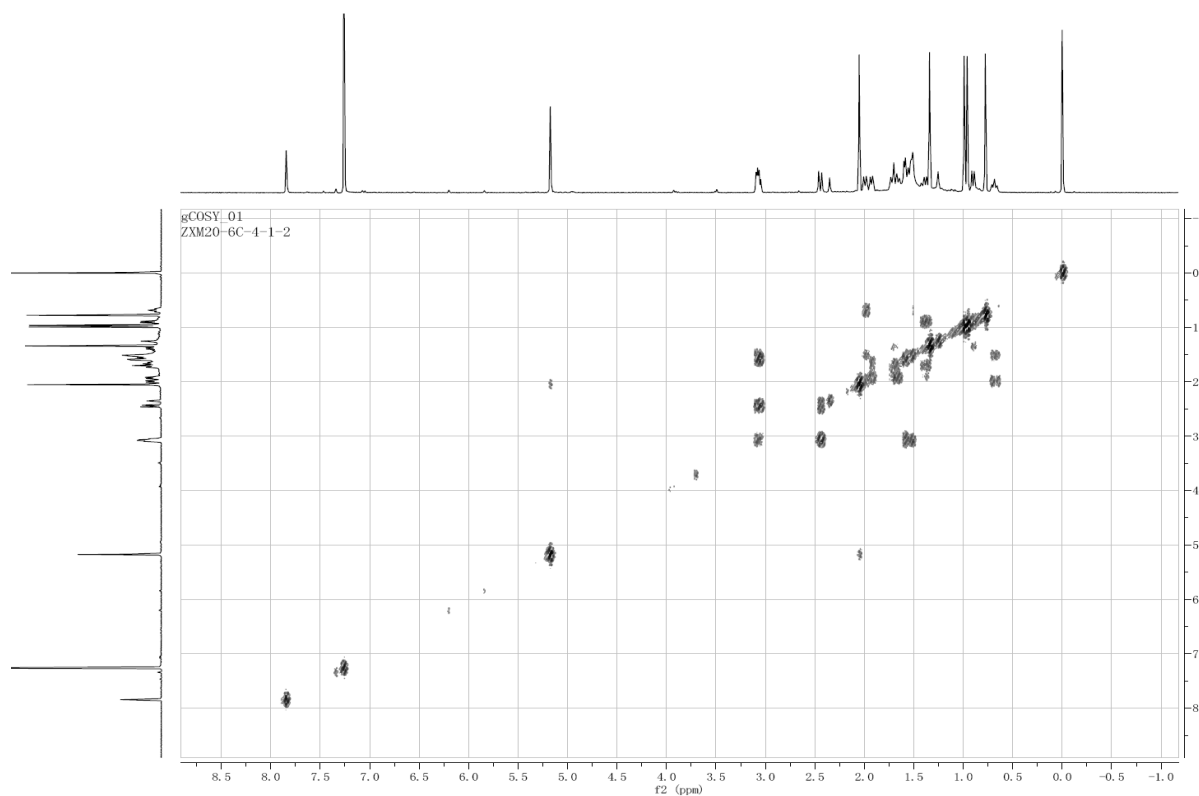

Figure S6. COSY spectrum of 1 in CDCl<sub>3</sub>.

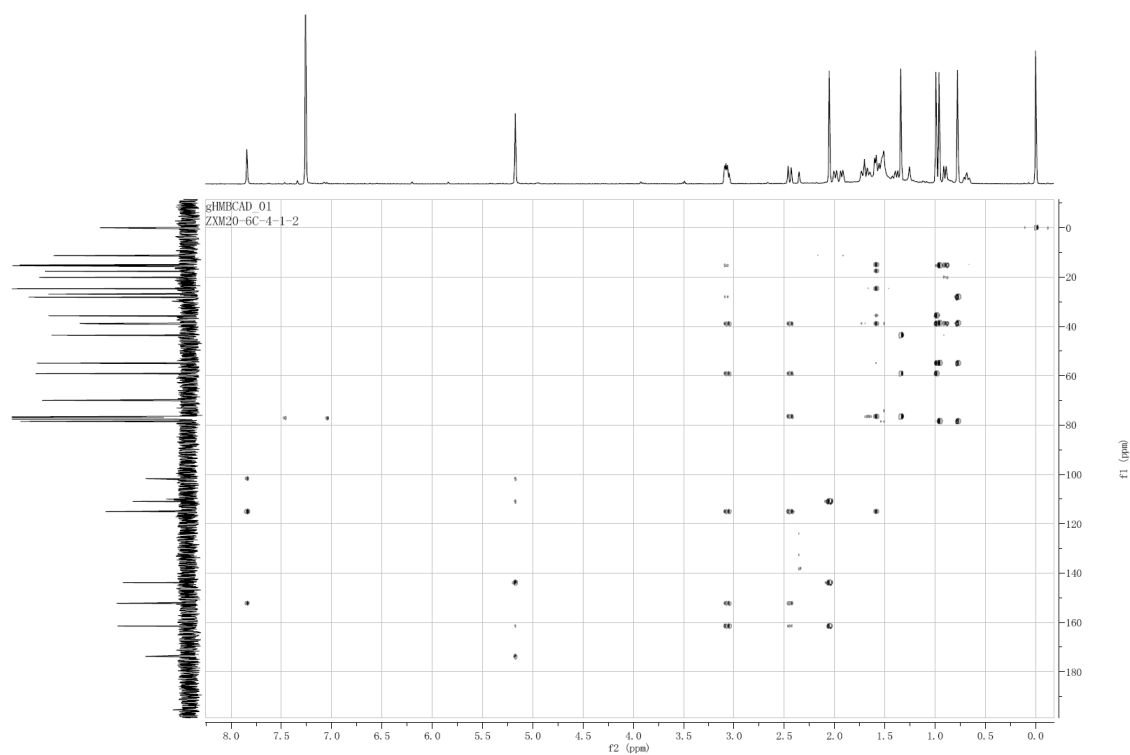

Figure S7. HMBC spectrum of **1** in CDCl<sub>3</sub>.

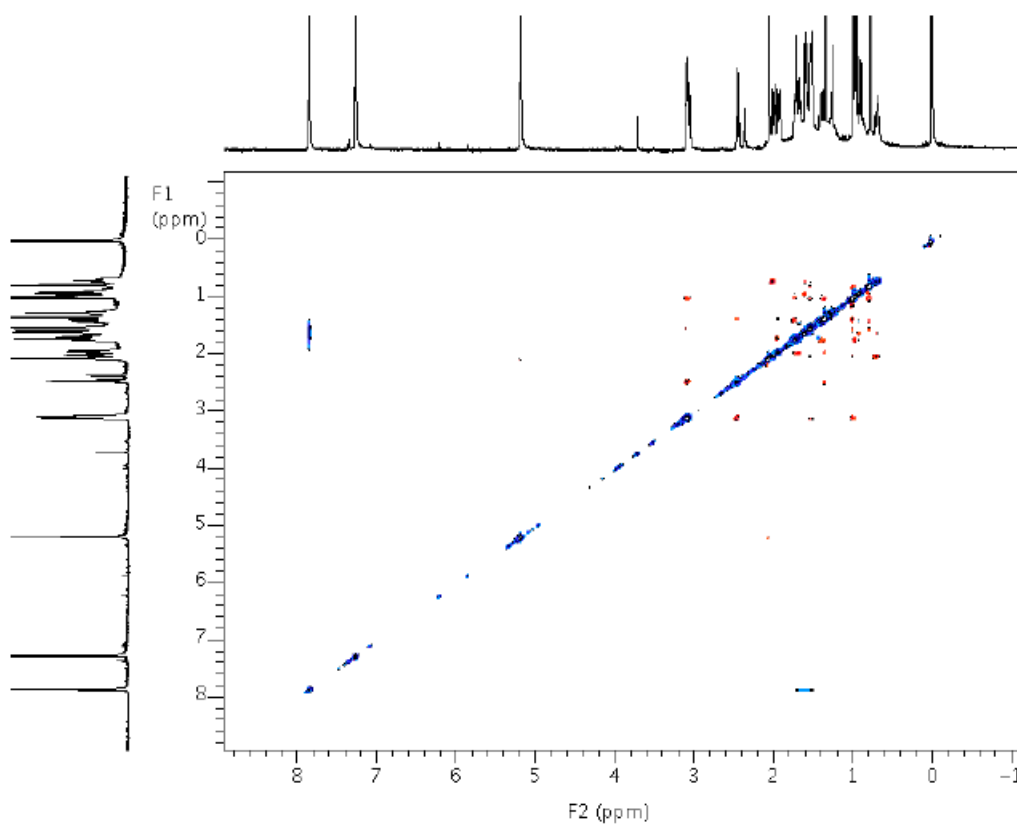

Figure S8. NOESY spectrum of **1** in CDCl<sub>3</sub>.

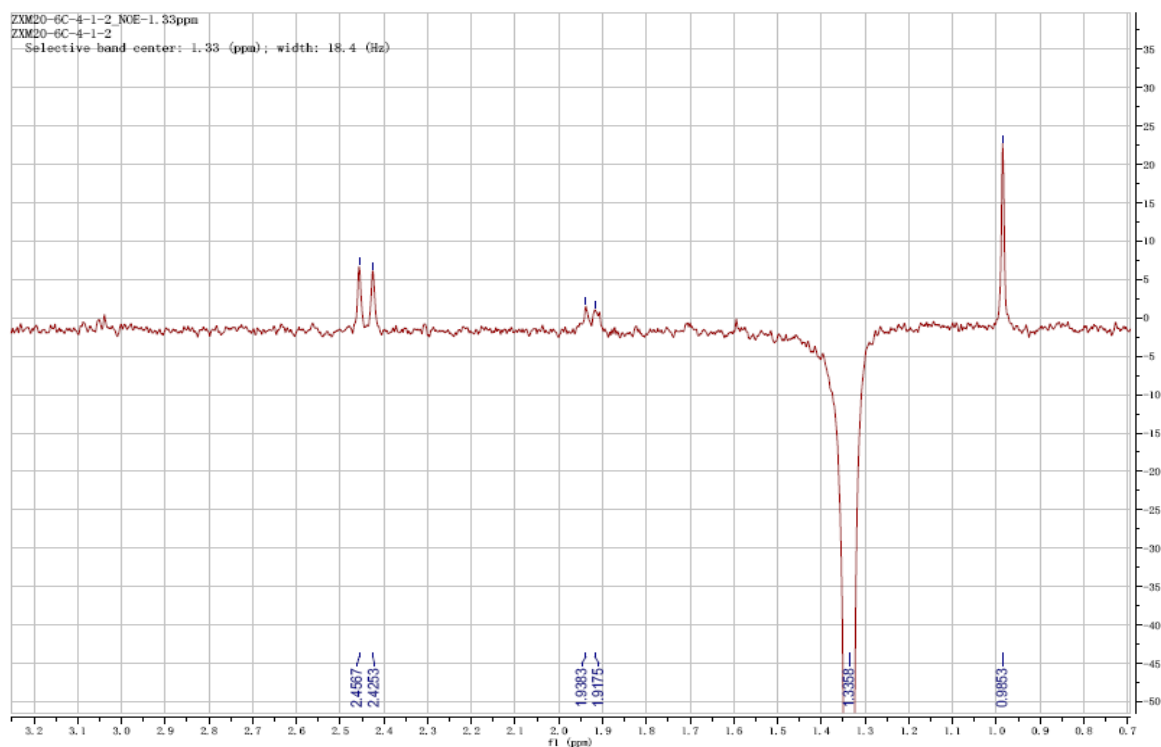Figure S9. NOE spectrum of 1 in CDCl<sub>3</sub>.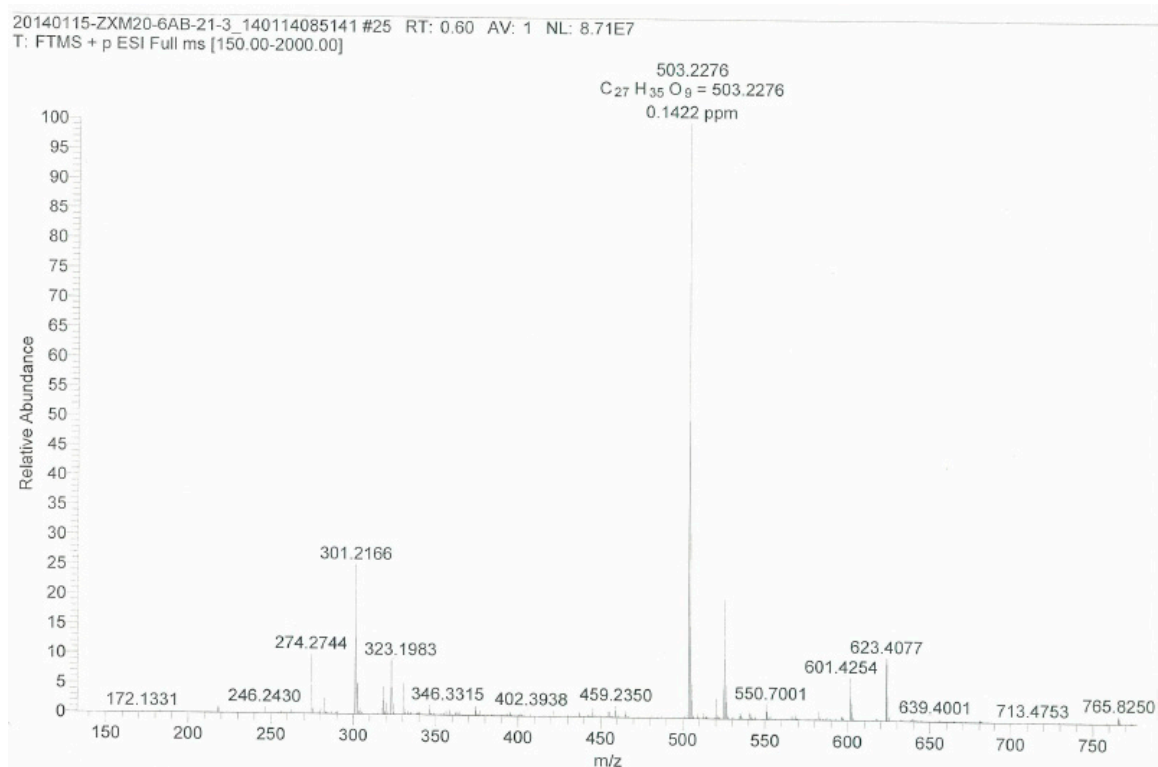

Figure S10. HR-ESI-MS of 2.

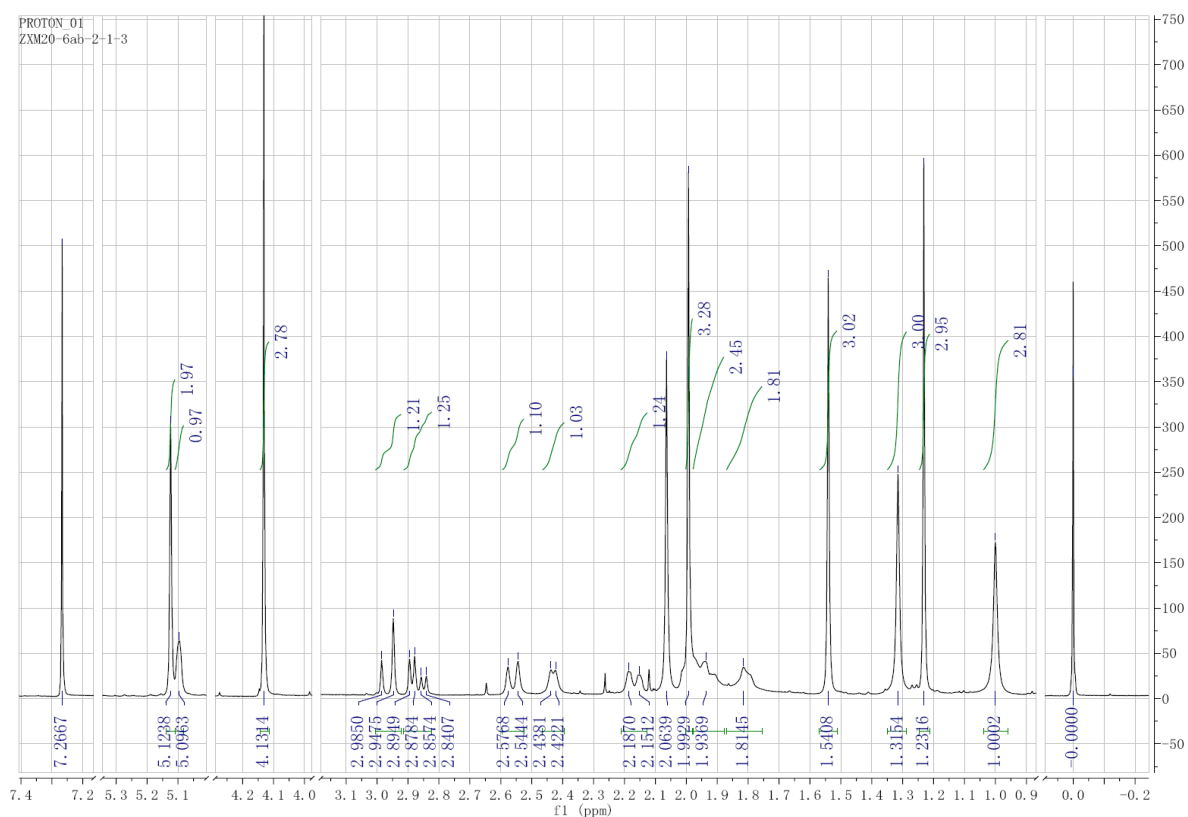

Figure S11.  $^1\text{H}$  NMR (500 MHz) spectrum of **2** in  $\text{CDCl}_3$ .

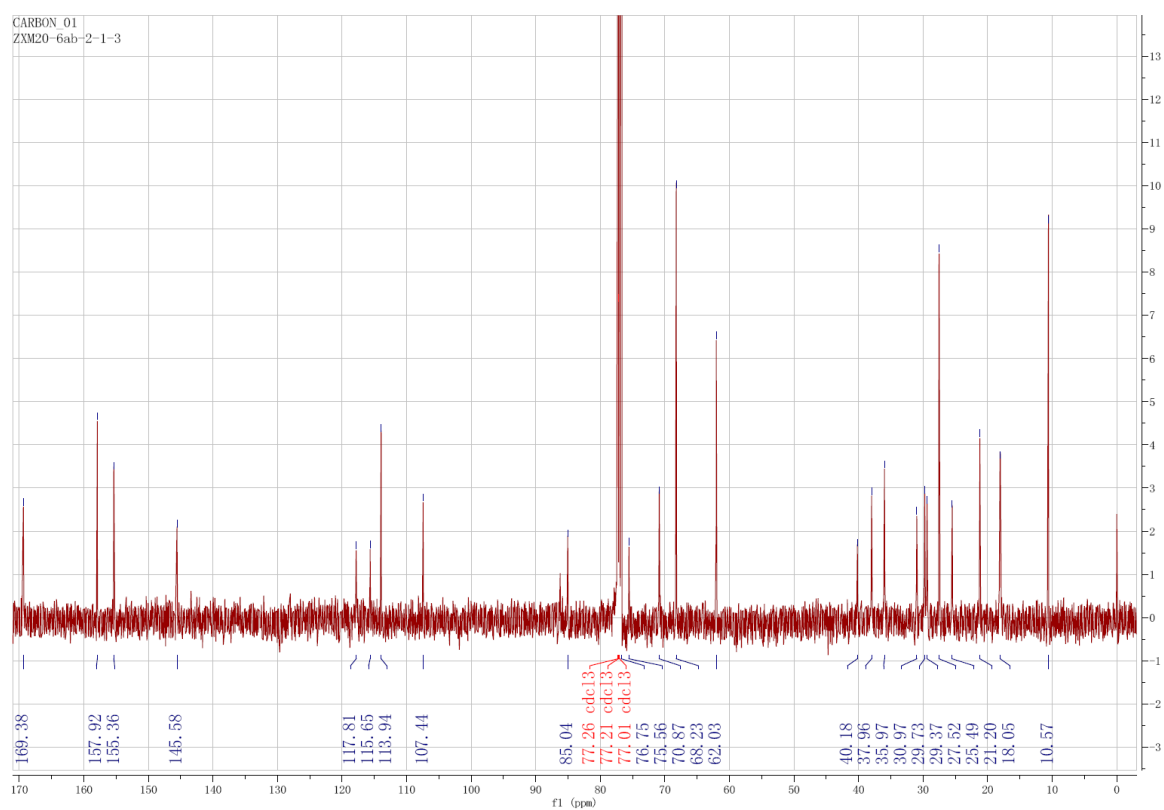

Figure S12.  $^{13}\text{C}$  NMR spectrum of **2** in  $\text{CDCl}_3$ .

CARBON\_01  
ZXM20-6ab-2-1-3

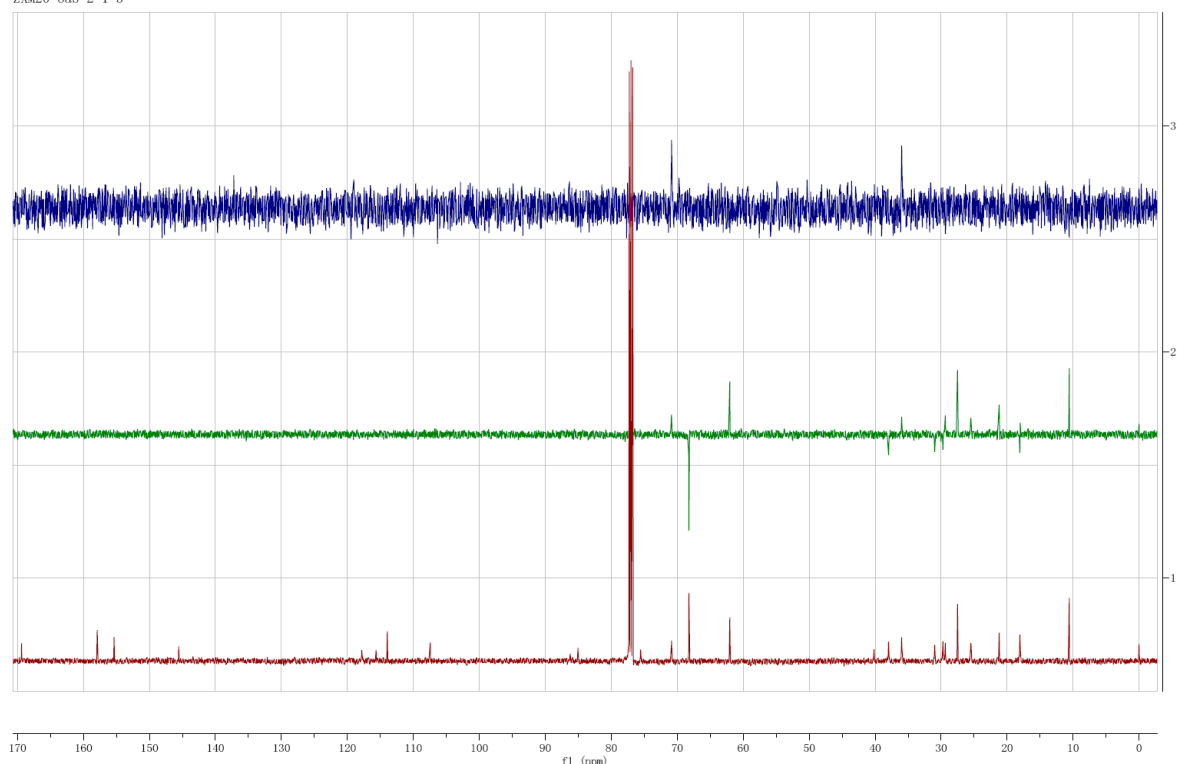

Figure S13. DEPT spectrum of 2 in CDCl<sub>3</sub>.

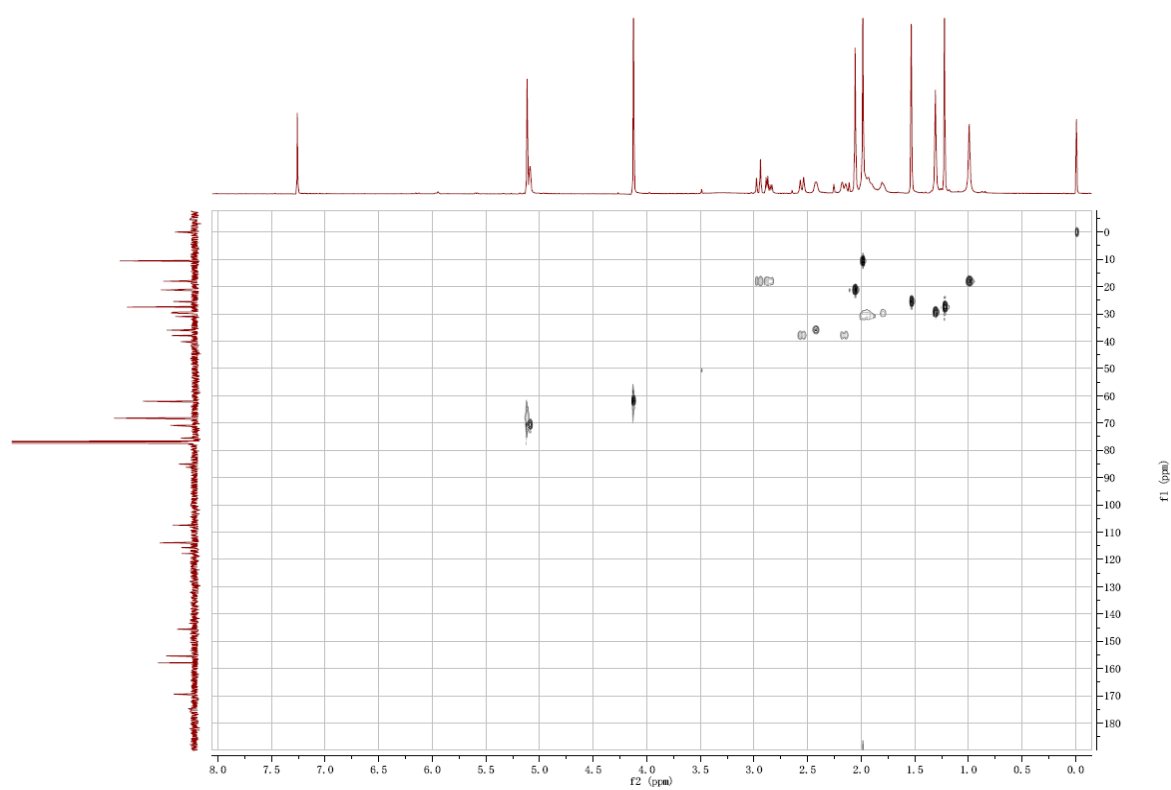

Figure S14. HMQC spectrum of 2 in CDCl<sub>3</sub>.

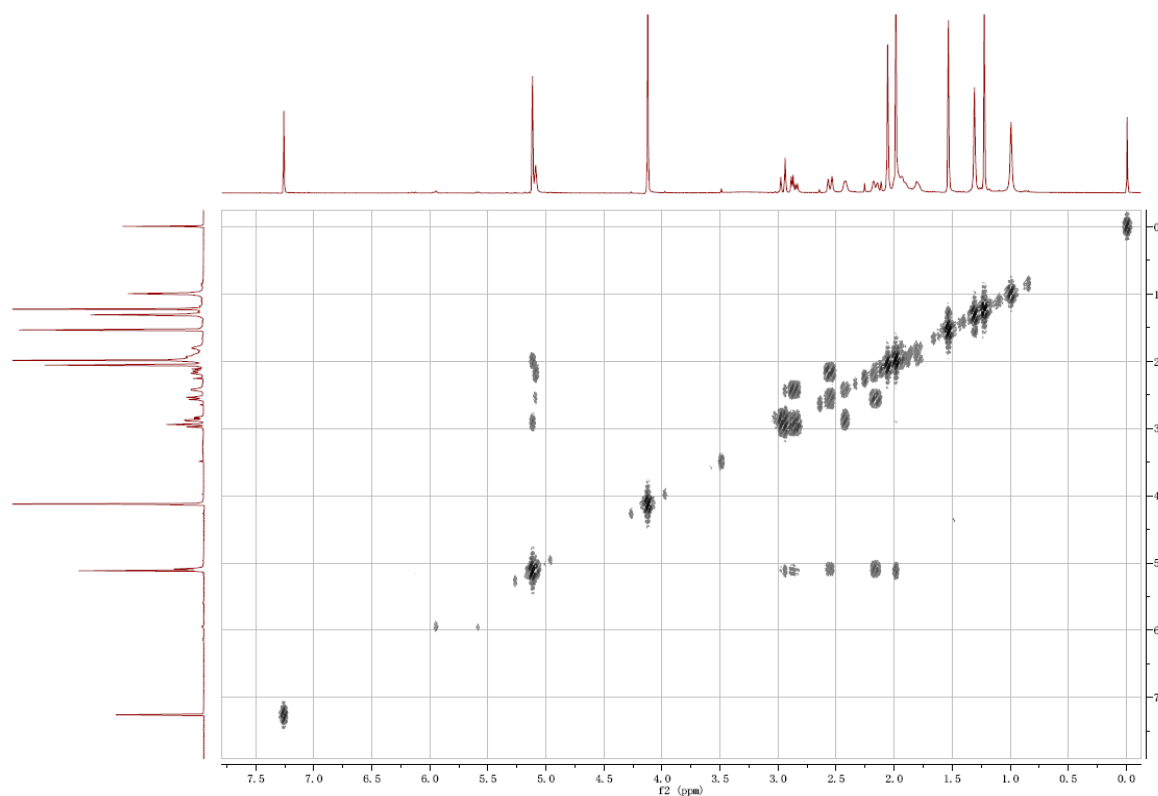

Figure S15. COSY spectrum of 2 in CDCl<sub>3</sub>.

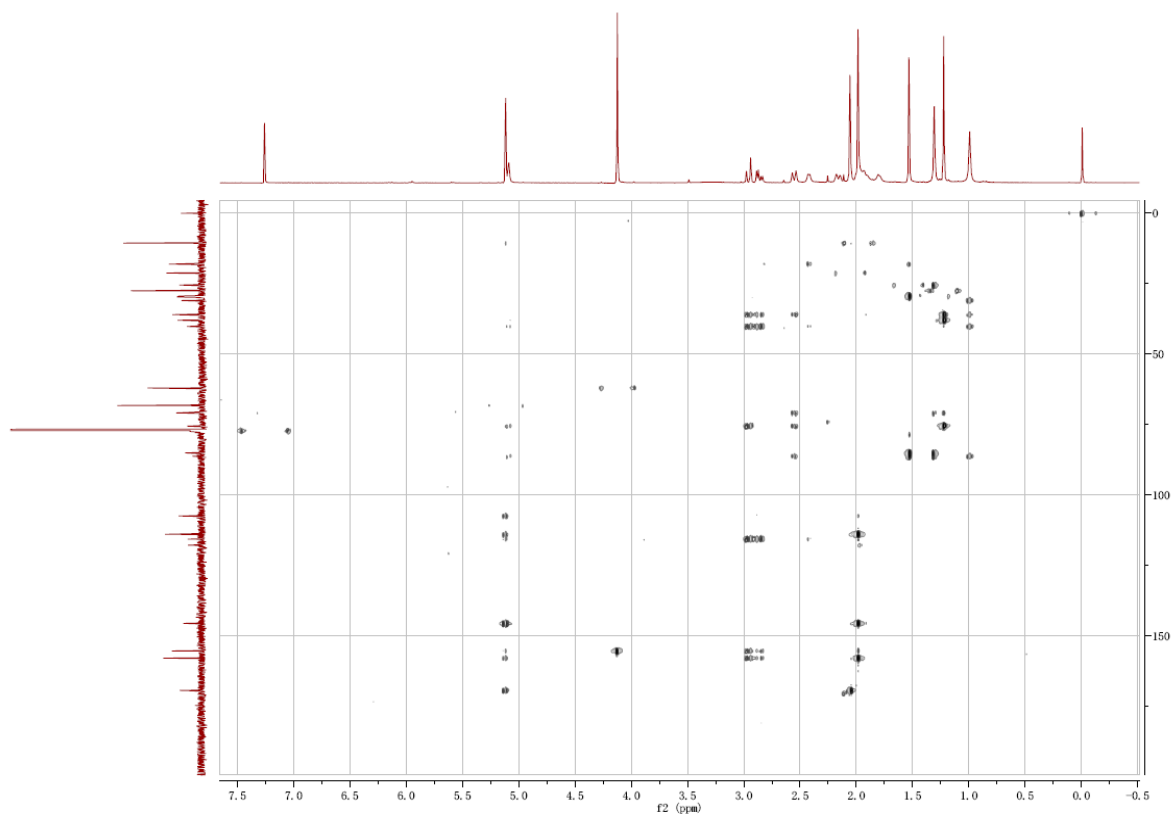

Figure S16. HMBC spectrum of 2 in CDCl<sub>3</sub>.



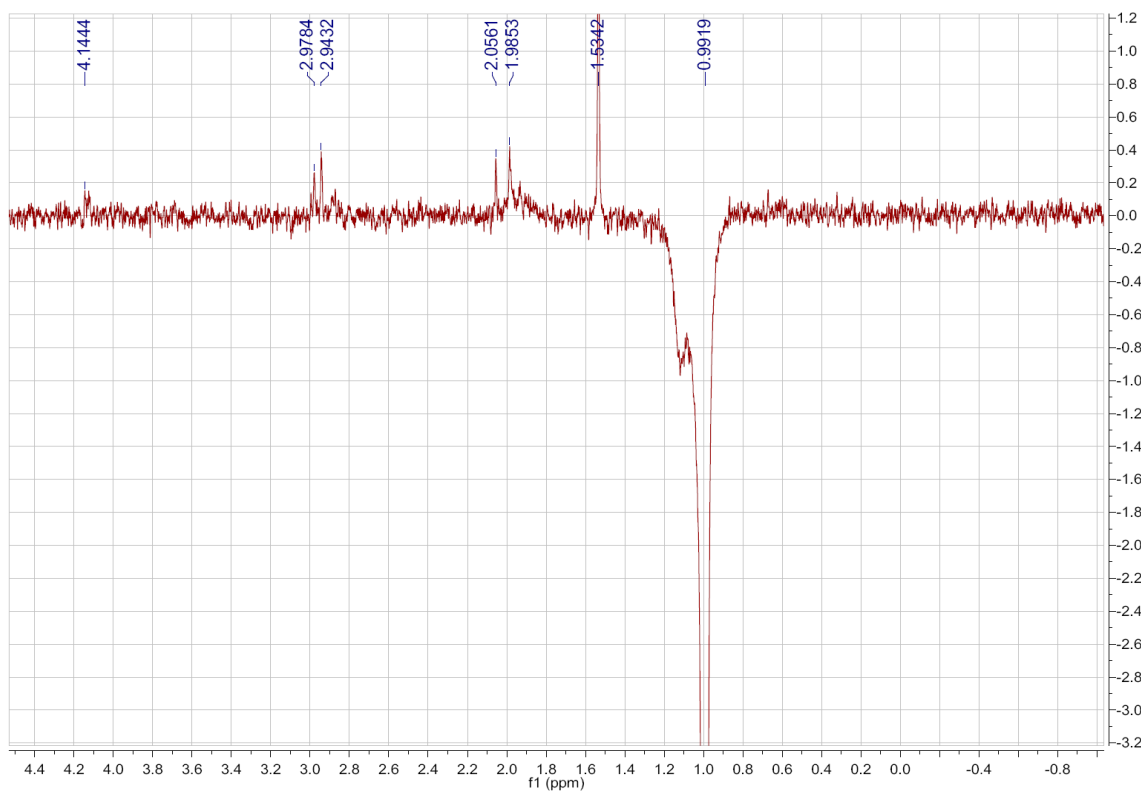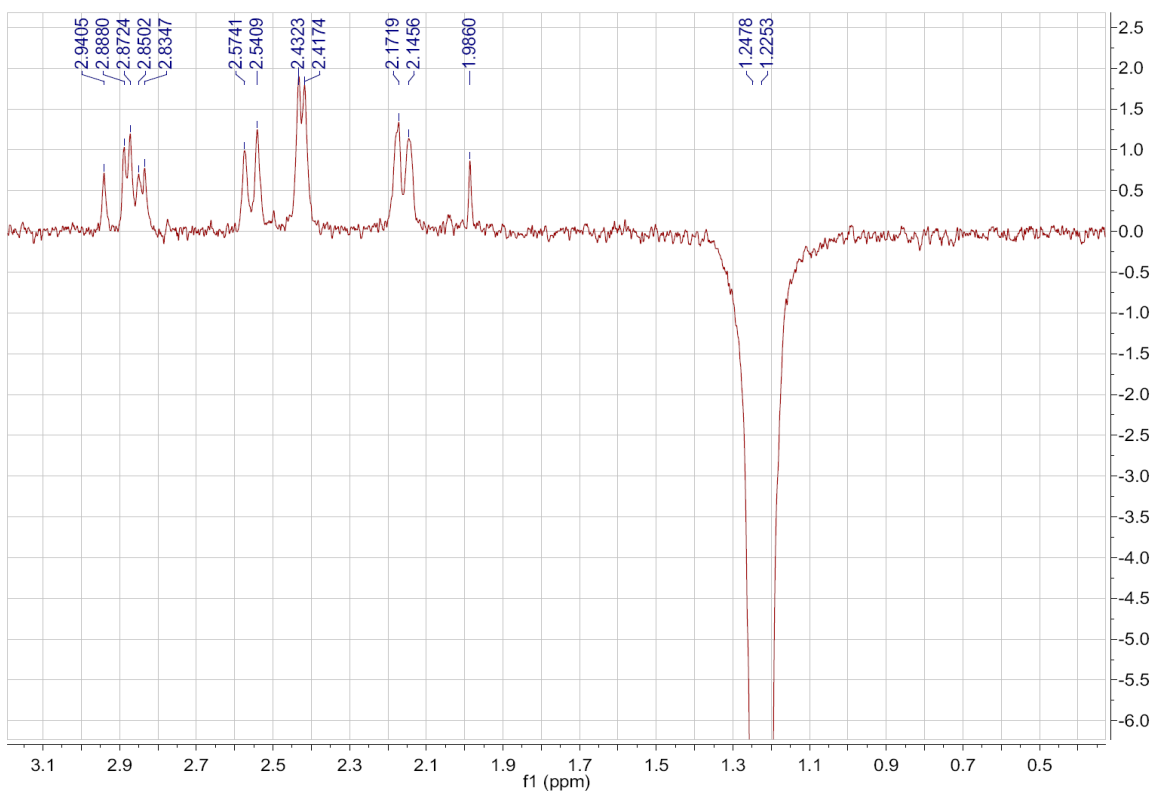

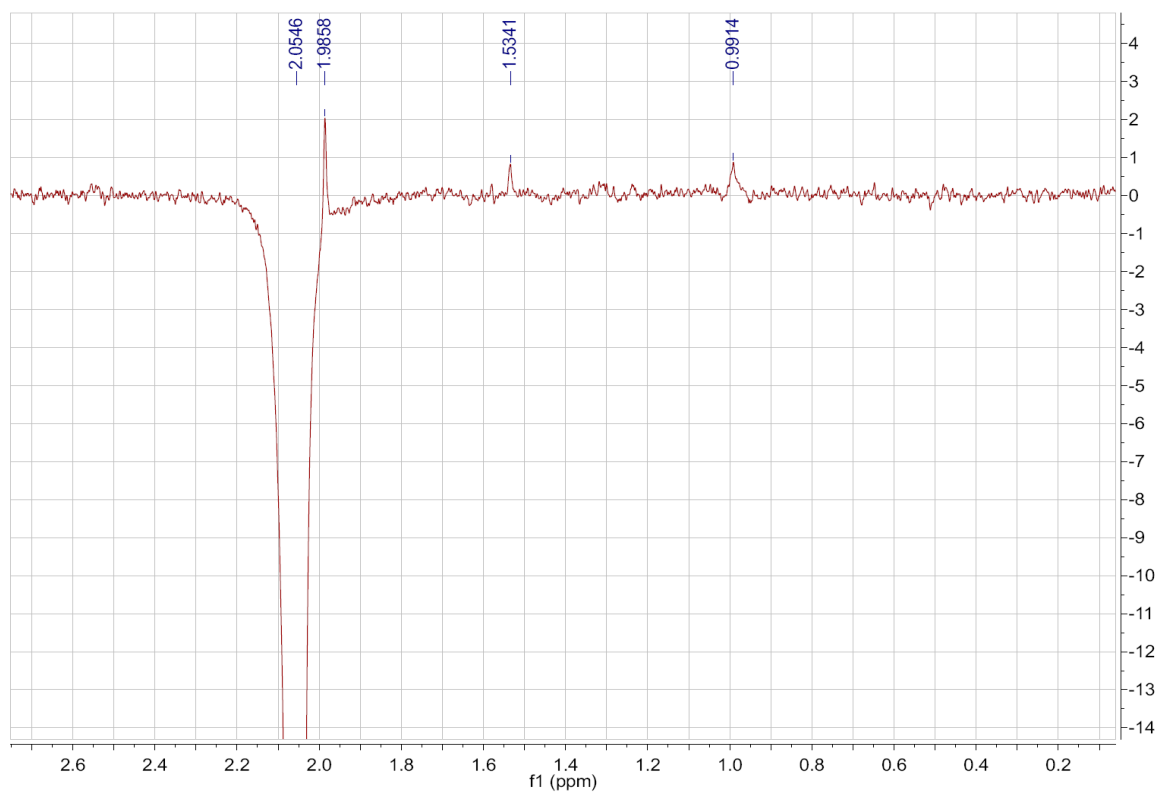

Figure S17. NOE spectra of 2 in CDCl<sub>3</sub>.

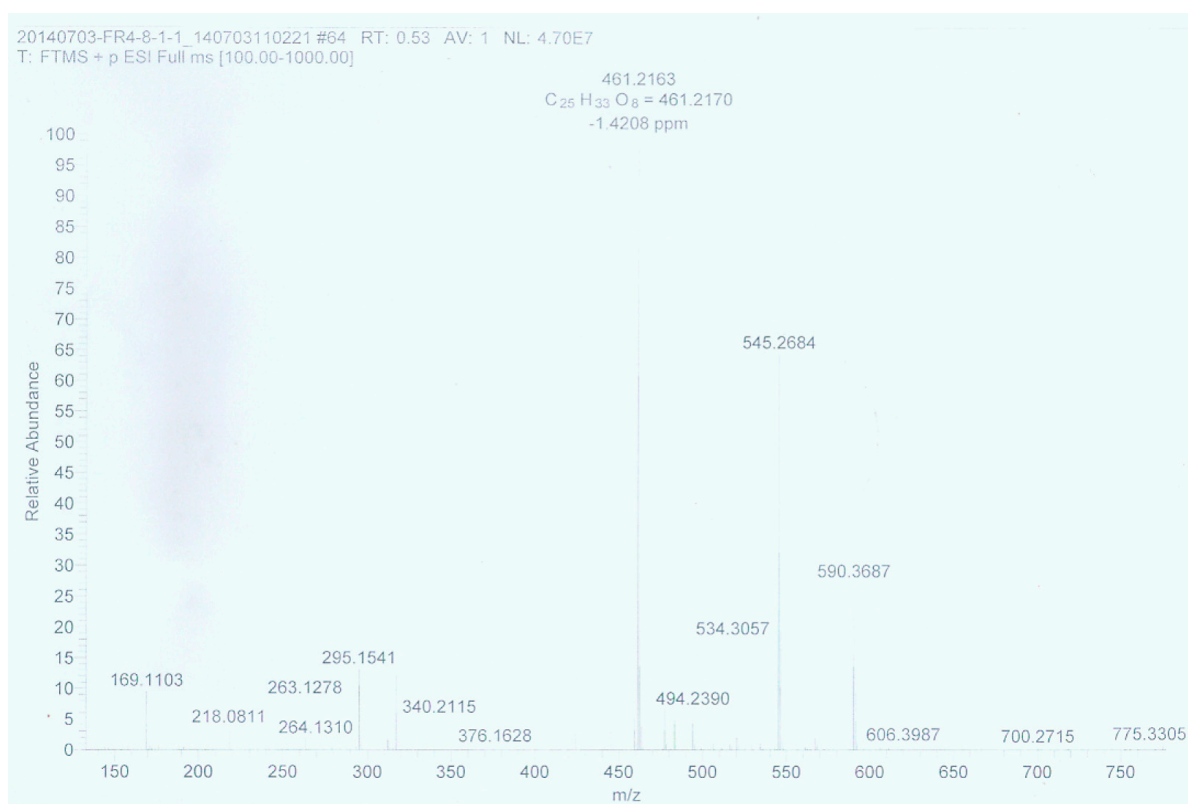

Figure S18. HRESIMS of Compound 3.

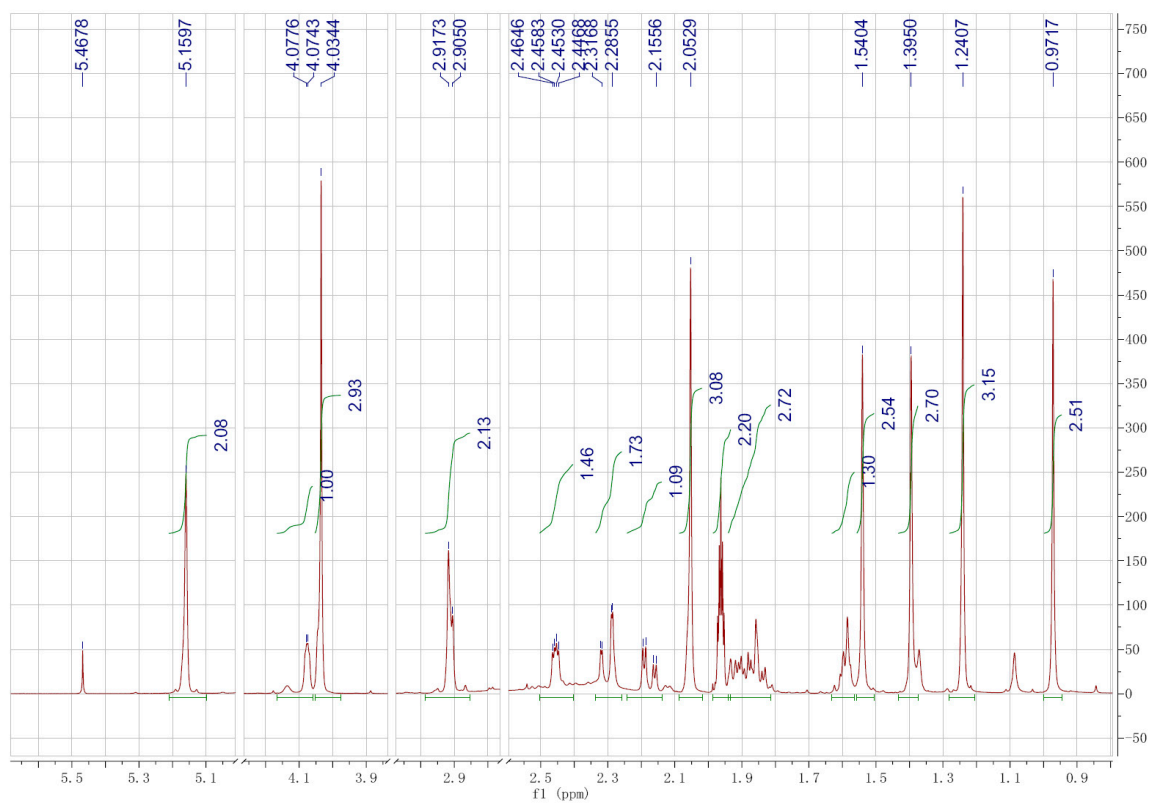

Figure S19.  $^1\text{H}$  NMR (500 MHz) spectrum of Compound 3 in  $\text{CD}_3\text{CN}$ .

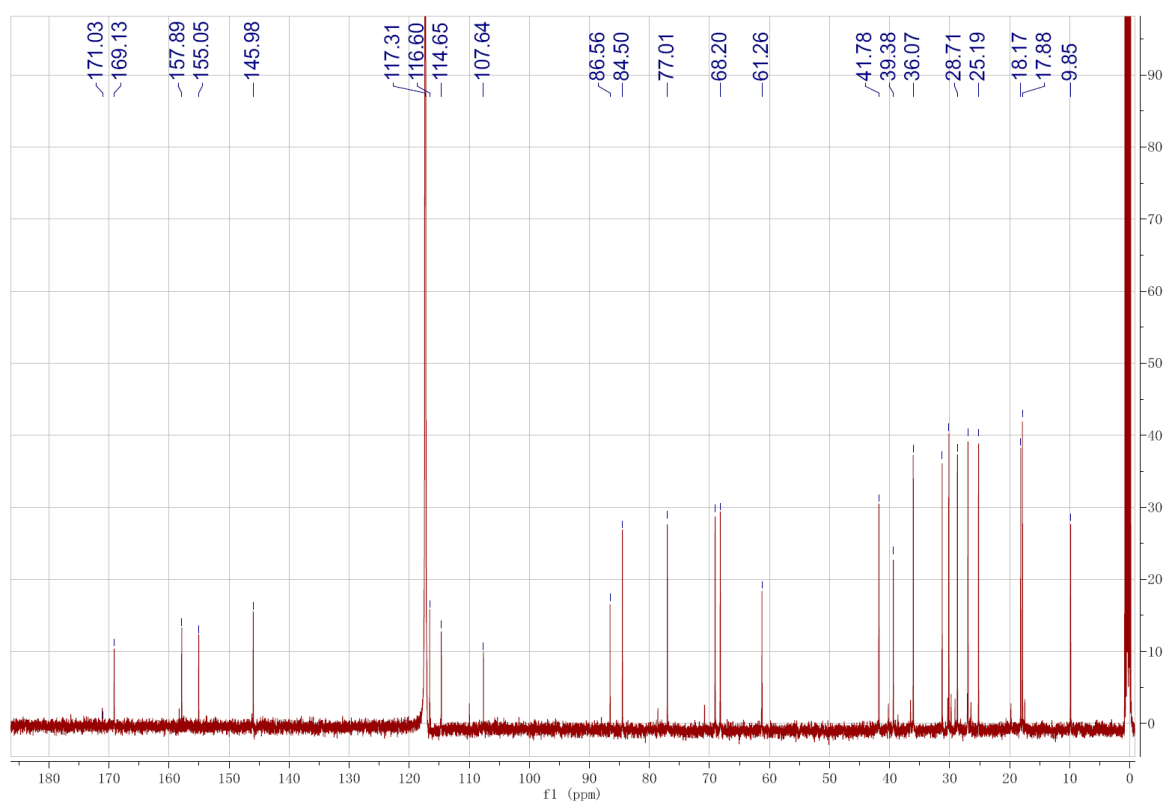

Figure S20.  $^{13}\text{C}$  NMR spectrum of Compound 3 in  $\text{CD}_3\text{CN}$ .

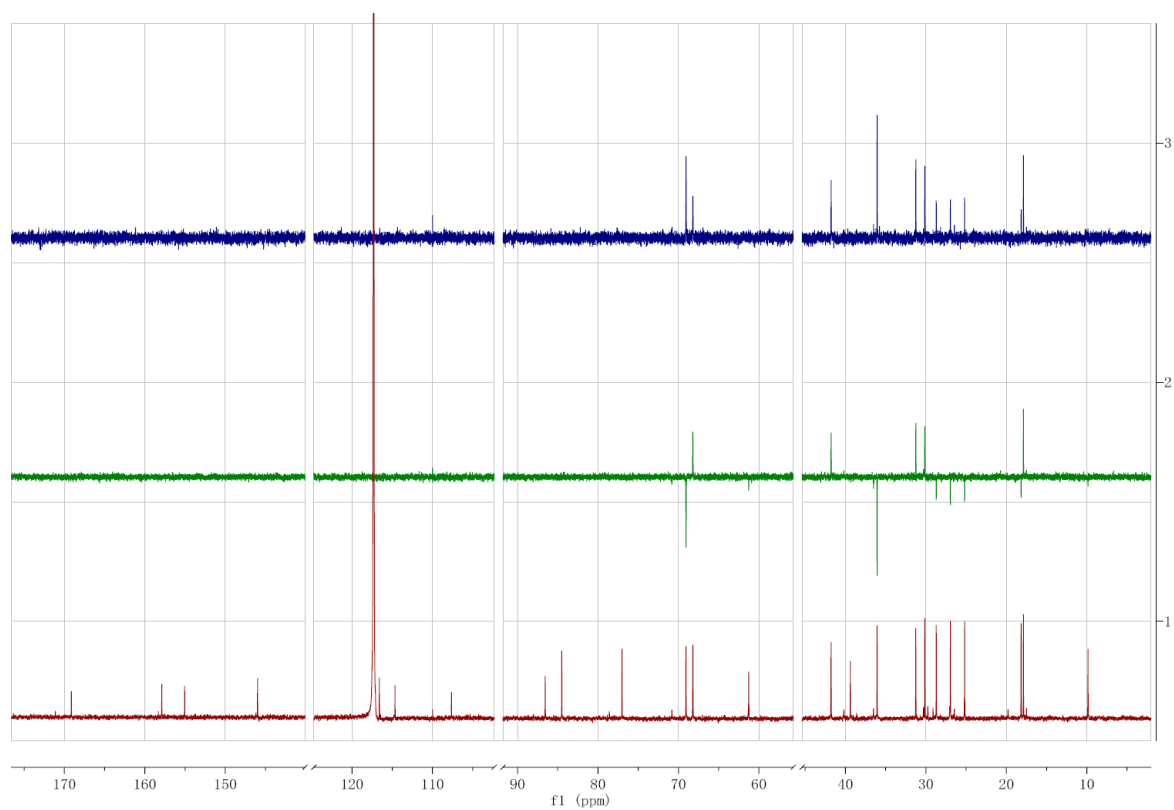

Figure S21. DEPT spectrum of Compound 3 in CD<sub>3</sub>CN.

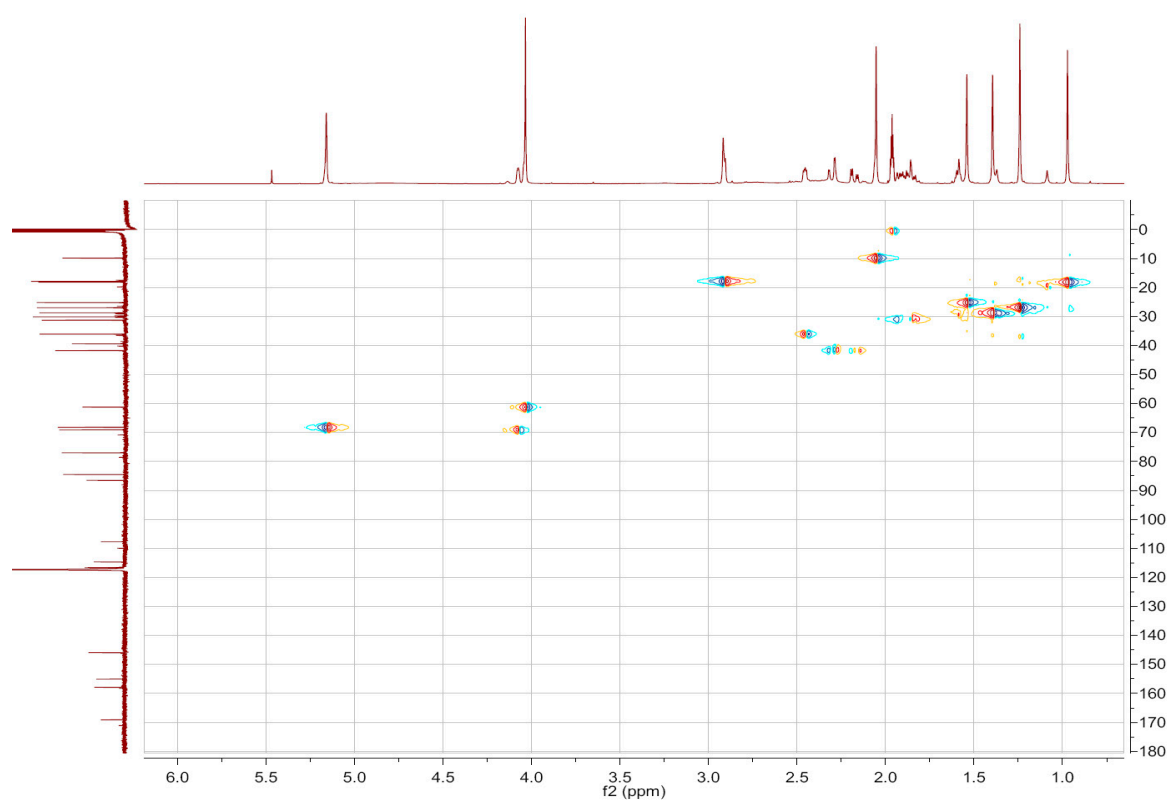

Figure S22. HMQC spectrum of Compound 3 in CD<sub>3</sub>CN.

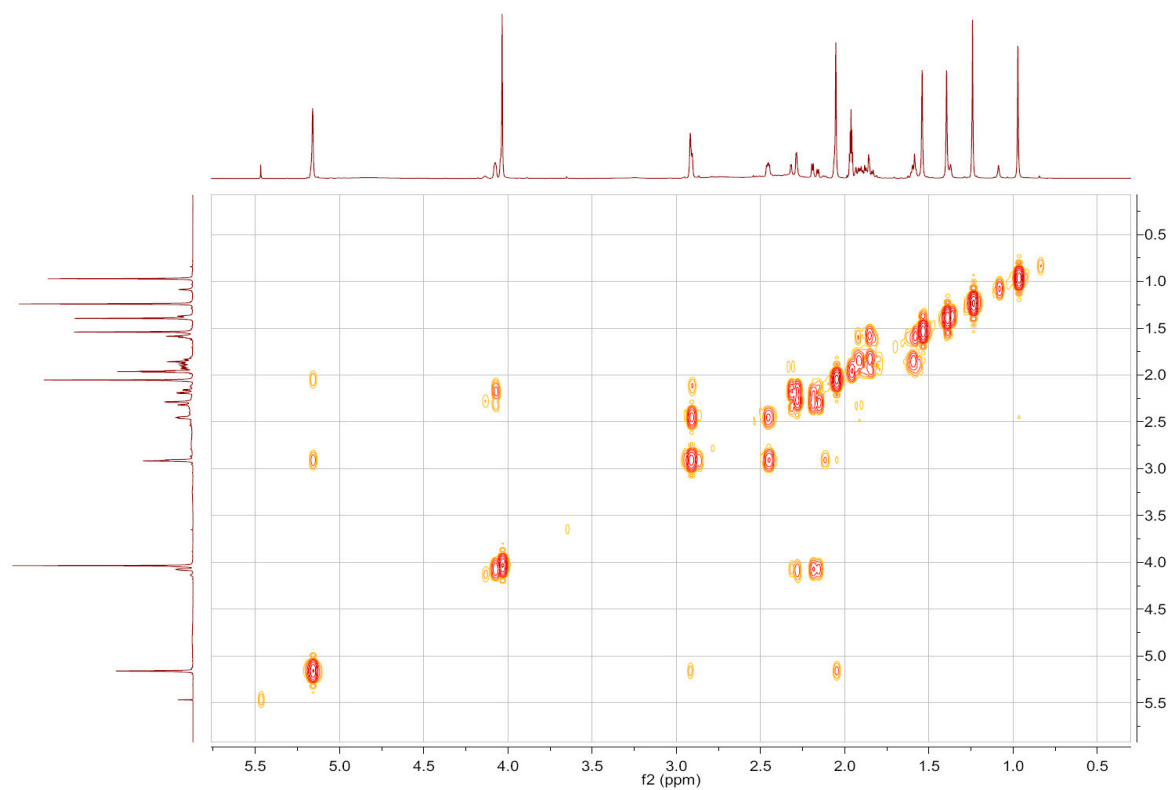

Figure S23. <sup>1</sup>H-<sup>1</sup>H COSY spectrum of Compound 3 in CD<sub>3</sub>CN.

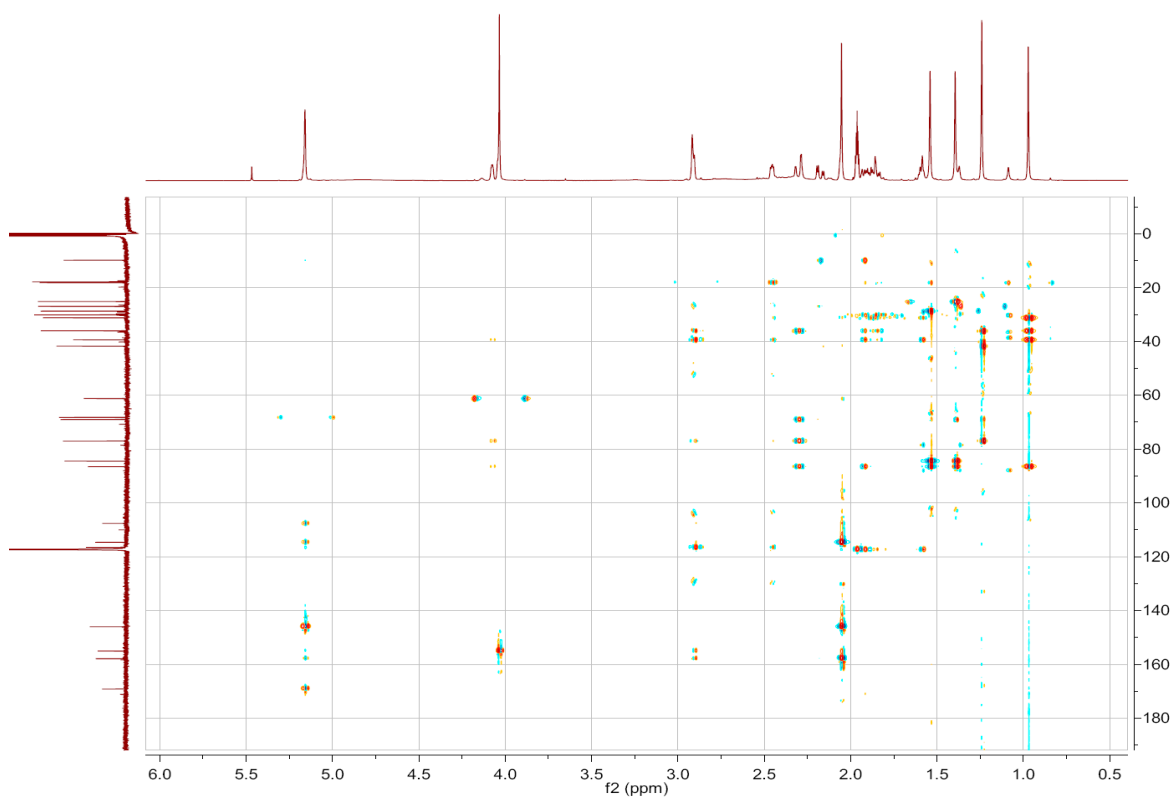

Figure S24. HMBC spectrum of Compound 3 in CD<sub>3</sub>CN.

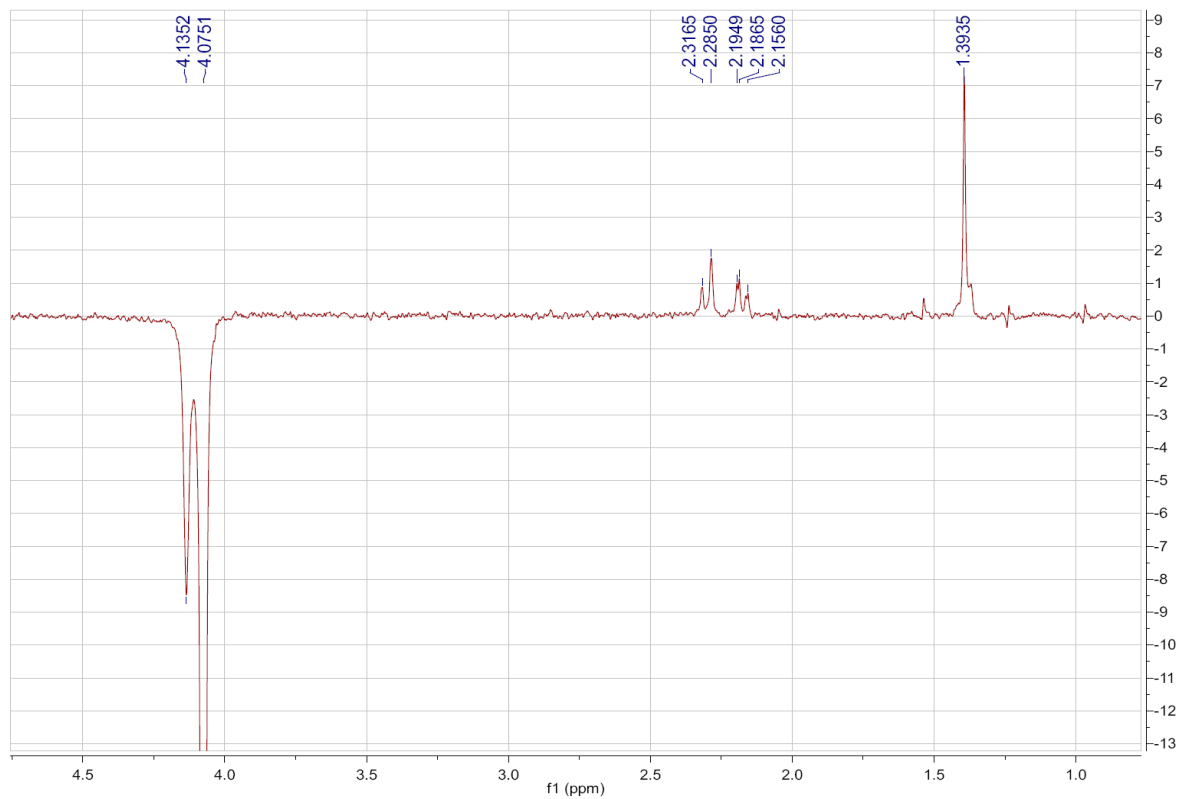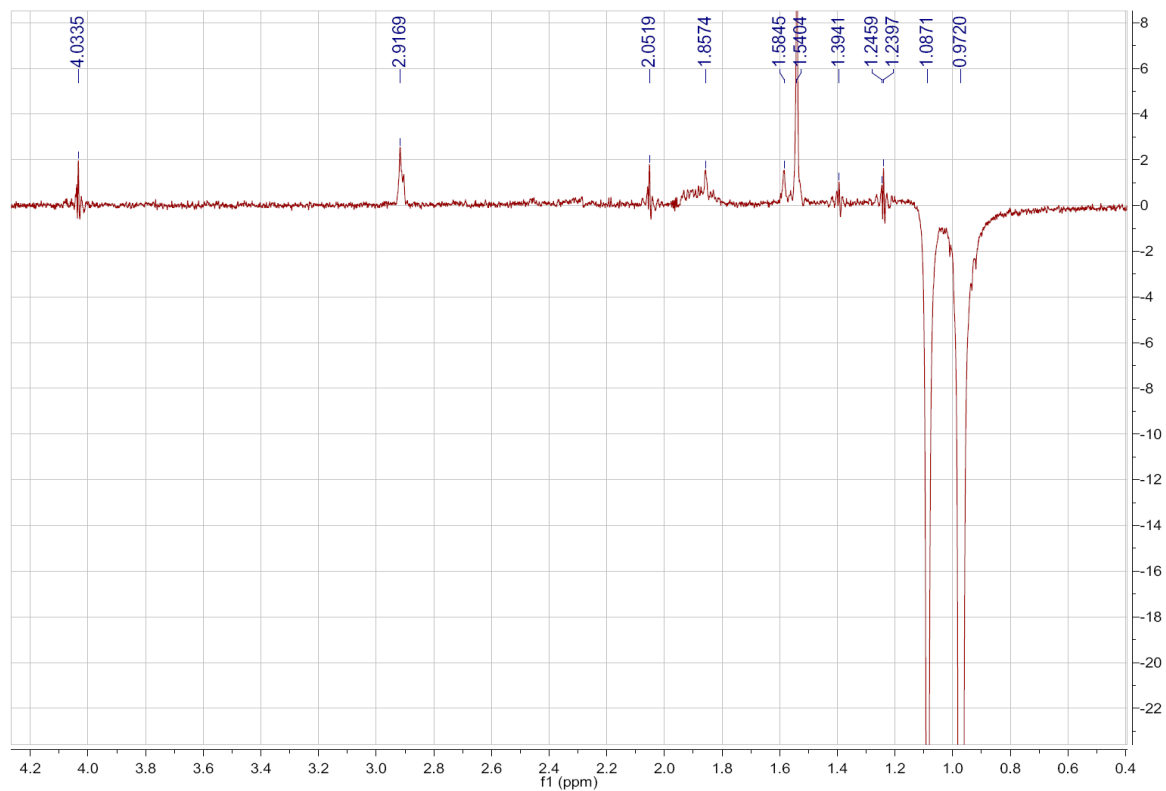

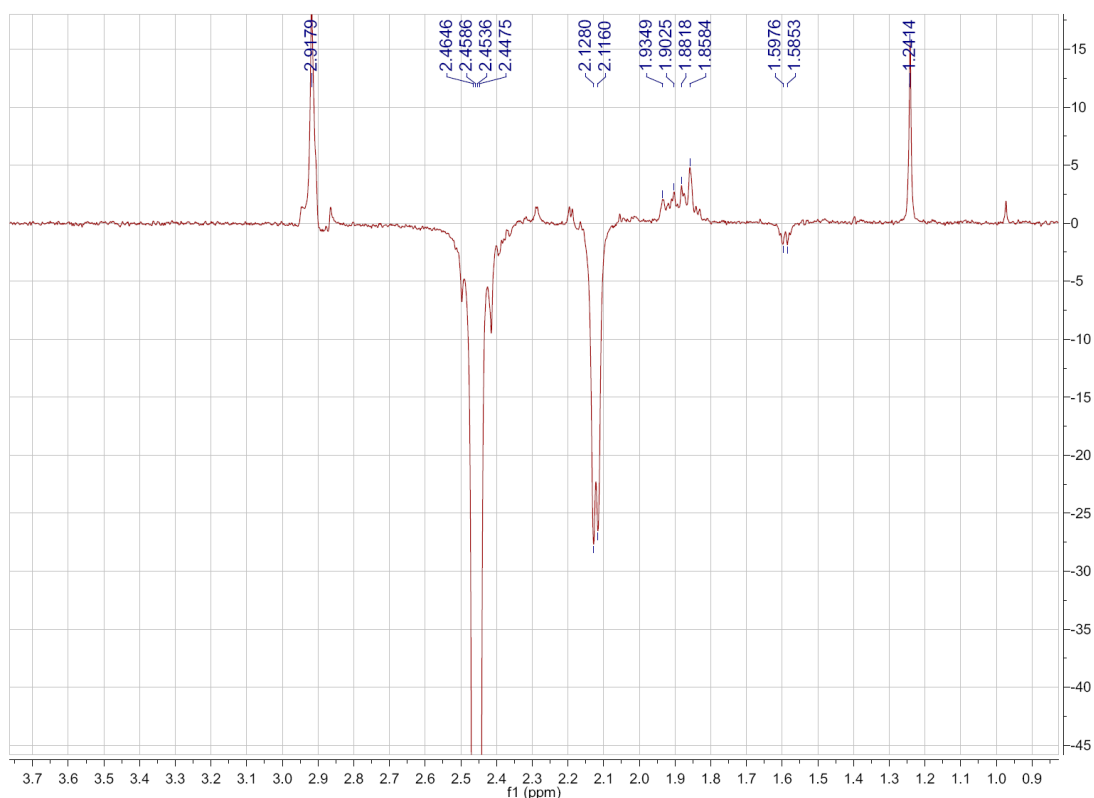

Figure S25. NOE spectra of Compound 3 in CD<sub>3</sub>CN.

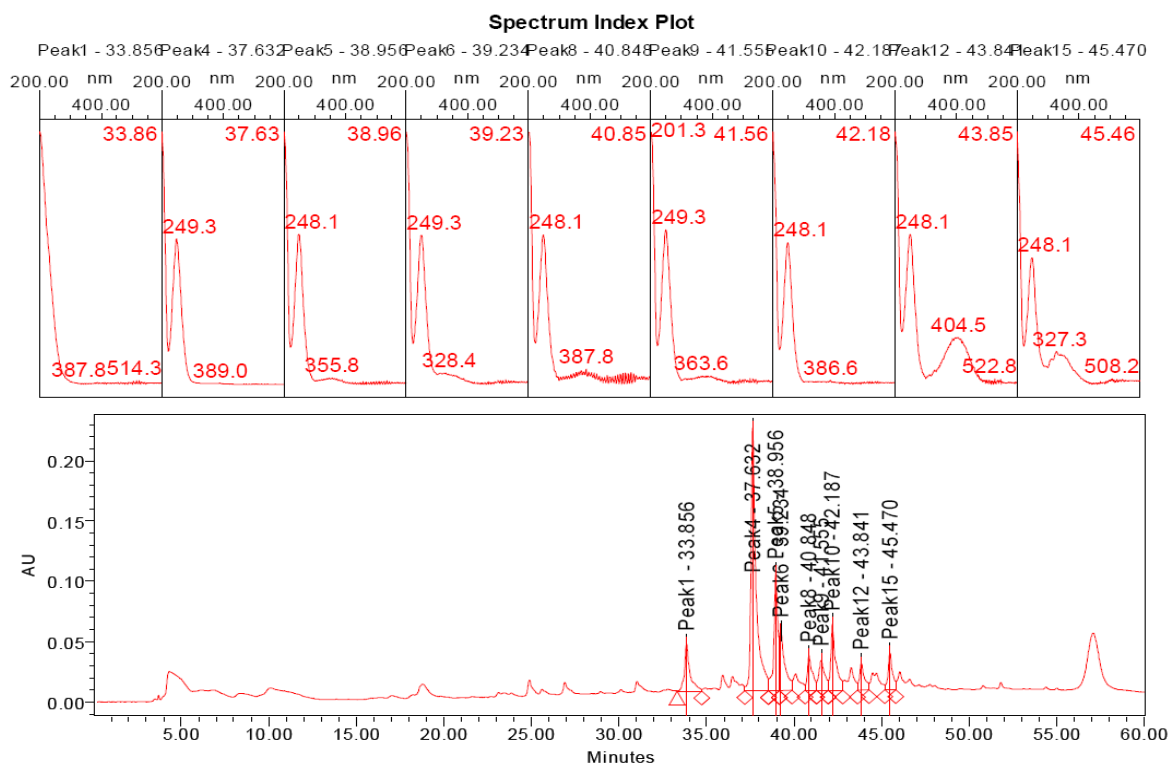

SampleName: ZXM20 2#; Vial: 4; Injection: 1; Date Acquired: 5/2/2013 5:22:47 PM CST

Figure S26. HPLC analysis of the EtOAc extract of *Aspergillus aureolatus* HDN14-107.

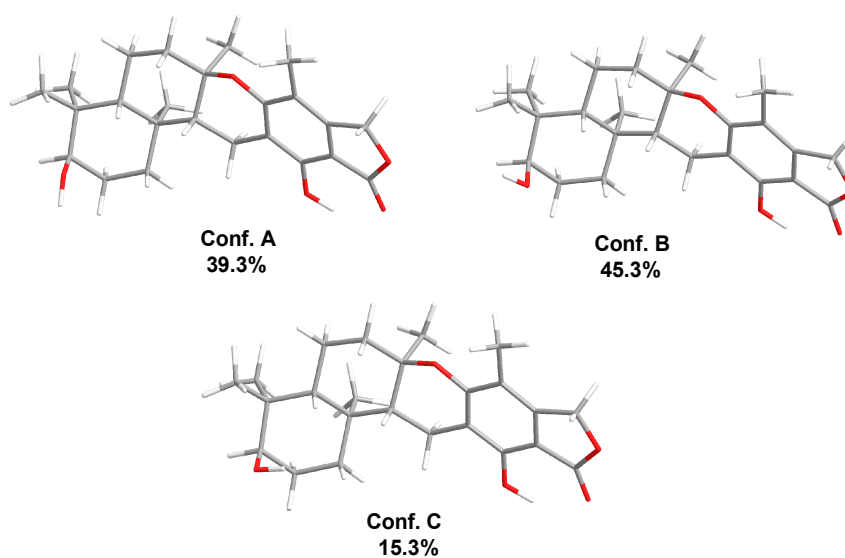

**Figure S27.** DFT-optimized structures for low-energy conformers of (11R, 14R, 17R, 20S, 21R)-1 at B3LYP/6-31+G (d) level in acetonitrile (Conformer populations were calculated using the Gibbs free energy and Boltzmann population at 298 K estimated thereof).
